# Supplementary material for: Intra-Arterial Transplantation of Stem Cells in Large Animals – A Minimally-Invasive Strategy for the Treatment of Disseminated Neurodegeneration
Source: Research Square preprint supplement (doi:10.21203/rs.3.rs-114224/v1), 2020-12-04
Supplement: Supplementary file 1 [file 576ae224ca787a5395390994.pdf]

# **Intra-arterial transplantation of stem cells in large animals – a minimally-invasive strategy for the treatment of disseminated neurodegeneration**

Izabela Malysz-Cymborska<sup>1#</sup>, Dominika Golubczyk<sup>1#</sup>, Lukasz Kalkowski<sup>1</sup>, Joanna Kwiatkowska<sup>1</sup>, Michal Zawadzki<sup>2</sup>, Joanna Głodek<sup>3</sup>, Piotr Holak<sup>3</sup>, Joanna Sanford<sup>4</sup>, Kamila Milewska<sup>1</sup>, Zbigniew Adamiak<sup>3</sup>, Piotr Walczak<sup>5</sup> and Mirosław Janowski<sup>5</sup>

<sup>1</sup> Dept of Neurosurgery, School of Medicine, Collegium Medicum, University of Warmia and Mazury in Olsztyn, Olsztyn, Poland

<sup>2</sup> Central Clinical Hospital of Ministry of the Interior and Administration in Warsaw, Poland

<sup>3</sup> Dept of Surgery and Radiology, Faculty of Veterinary Medicine, University of Warmia and Mazury, Olsztyn, Poland

<sup>4</sup> Sanford Biotech, Warsaw, Poland

<sup>5</sup> Center for Advanced Imaging Research and Department of Diagnostic Radiology and Nuclear Medicine, University of Maryland School of Medicine, Baltimore, MD, USA

#These authors contributed equally to this work

**\*To whom correspondence should be addressed:**

**Izabela Malysz-Cymborska**

Department of Neurosurgery

School of Medicine

University of Warmia and Mazury, Olsztyn, Poland

ORCID iD 0000-0003-4192-6726

[i.malysz-cymborska@uwm.edu.pl](mailto:i.malysz-cymborska@uwm.edu.pl)

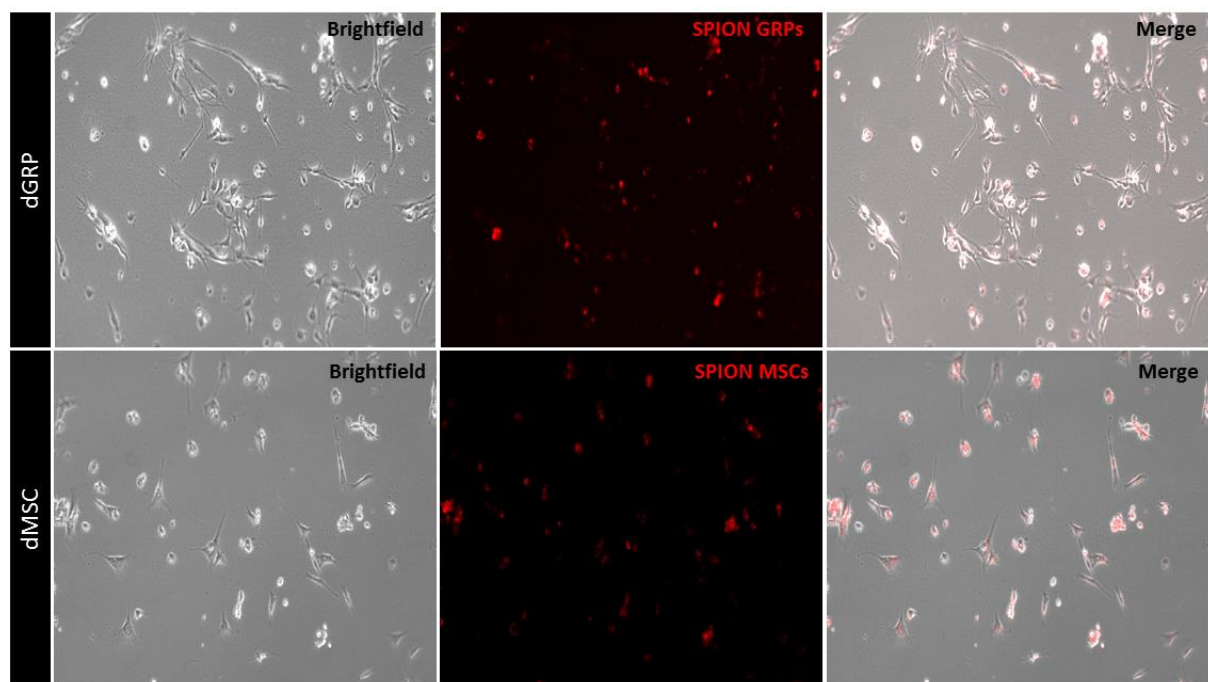

**Supplementary Figure 1.** *Light microscopy of cells before transplantation.* Images of cGRPs (upper panel) and cMSCs (bottom panel) labeled with SPION for transplantation (10x magnification).
